# Supplementary material
Source: PubMed Central journal article supplement (PMC8983440)
Supplement: NIHMS1775832-supplement-1.pdf [file NIHMS1775832-supplement-1.pdf]

**Supplementary data for:**

**<sup>89</sup>Zr-ImmunoPET shows therapeutic efficacy of anti-CD20 interferon- $\alpha$  fusion protein in a murine B-cell lymphoma model**

Kirstin A Zettlitz<sup>1,4</sup>, Felix B Salazar<sup>1</sup>, Reiko E Yamada<sup>2</sup>, K Ryan Trinh<sup>3</sup>, Alex Vasuthasawat<sup>3</sup>, John M Timmerman<sup>2</sup>, Sherie L Morrison<sup>3</sup> and Anna M Wu<sup>1,4</sup>

<sup>1</sup> Crump Institute for Molecular Imaging, Department of Molecular and Medical Pharmacology, David Geffen School of Medicine, University of California, Los Angeles, Los Angeles, California

<sup>2</sup> Division of Hematology & Oncology, Department of Medicine, University of California, Los Angeles, Los Angeles, California

<sup>3</sup> Department of Microbiology, Immunology, and Molecular Genetics, University of California, Los Angeles, Los Angeles, California

<sup>4</sup> Present Address: Department of Immunology and Theranostics, Beckman Research Institute of the City of Hope, Duarte, California

Running title: <sup>89</sup>Zr-anti-CD20-IFN $\alpha$  immunoPET in B-cell lymphoma

**Table S1. Radiolabeling results**

|                                                  | <sup>89</sup> Zr-DFO-Rit-mIFN $\alpha$ |   | <sup>89</sup> Zr-DFO-Rit |   |
|--------------------------------------------------|----------------------------------------|---|--------------------------|---|
|                                                  | Mean $\pm$ SD                          | N | Mean $\pm$ SD            | N |
| <b>Labeling Efficiency [%]</b>                   | 98.0 $\pm$ 1.3                         | 2 | 98.0 $\pm$ 0.9           | 3 |
| <b>Specific Activity [MBq/<math>\mu</math>g]</b> | 0.21 $\pm$ 0.01                        | 2 | 0.19 $\pm$ 0.03          | 3 |
| <b>Radiochemical Purity [%]</b>                  | 99.1 $\pm$ 0.06                        | 2 | 98.7 $\pm$ 1.1           | 3 |
| <b>Immunoreactivity (38C13-hCD20)</b>            | 64.2 $\pm$ 6.3                         | 2 | 64.6 $\pm$ 15.0          | 3 |
| <b>Immunoreactivity (38C13)</b>                  | 44.6 $\pm$ 3.3                         | 2 | 8.1 $\pm$ 5.2            | 2 |

**Table S2. Ex vivo biodistribution.** Site-specifically radiolabeled (mal-DFO) species-specific fusion proteins and parental antibodies. C3H mice bearing 38C13-hCD20 subcutaneous tumors. 20 h p.i. of 10  $\mu$ g protein. N=4 per group, %ID/g values are depicted as mean  $\pm$  SEM.

|                    | <sup>89</sup> Zr-anti-CD20 hIgG1-hIFN $\alpha$ 14 |     | <sup>89</sup> Zr-anti-CD20 hIgG1 (Rit) |     | <sup>89</sup> Zr-anti-CD20 mIgG2a-mIFN $\alpha$ 1 |     | <sup>89</sup> Zr-anti-CD20 mIgG2a |     |
|--------------------|---------------------------------------------------|-----|----------------------------------------|-----|---------------------------------------------------|-----|-----------------------------------|-----|
|                    | Mean                                              | SEM | Mean                                   | SEM | Mean                                              | SEM | Mean                              | SEM |
| <b>Blood</b>       | 7.7                                               | 1.0 | 8.5                                    | 1.9 | 3.2                                               | 0.6 | 4.6                               | 1.1 |
| <b>38C13-hCD20</b> | 14.0                                              | 3.1 | 40.7                                   | 7.5 | 10.6                                              | 2.5 | 16.9                              | 3.3 |
| <b>Heart</b>       | 3.2                                               | 0.5 | 3.3                                    | 0.6 | 1.6                                               | 0.2 | 1.7                               | 0.4 |
| <b>Lung</b>        | 3.8                                               | 0.5 | 4.2                                    | 0.8 | 2.2                                               | 0.3 | 2.5                               | 0.7 |
| <b>Liver</b>       | 20.6                                              | 2.2 | 4.5                                    | 0.8 | 23.9                                              | 2.7 | 4.1                               | 0.7 |
| <b>Kidney</b>      | 33.8                                              | 3.4 | 6.4                                    | 0.3 | 6.9                                               | 0.8 | 2.8                               | 0.5 |
| <b>Spleen</b>      | 36.1                                              | 3.4 | 4.9                                    | 0.6 | 19.1                                              | 2.0 | 6.0                               | 1.0 |
| <b>Stomach</b>     | 1.1                                               | 0.1 | 1.0                                    | 0.1 | 1.0                                               | 0.1 | 0.6                               | 0.1 |
| <b>Intestine</b>   | 2.1                                               | 0.4 | 1.6                                    | 0.1 | 2.0                                               | 0.1 | 0.9                               | 0.1 |
| <b>Muscle</b>      | 0.5                                               | 0.1 | 0.7                                    | 0.1 | 0.3                                               | 0.0 | 0.3                               | 0.1 |
| <b>Carcass</b>     | 1.4                                               | 0.2 | 1.7                                    | 0.1 | 0.9                                               | 0.1 | 0.8                               | 0.1 |

**A)  $^{89}\text{Zr}$ -anti-CD20 mlgG2a-mIFN $\alpha$**

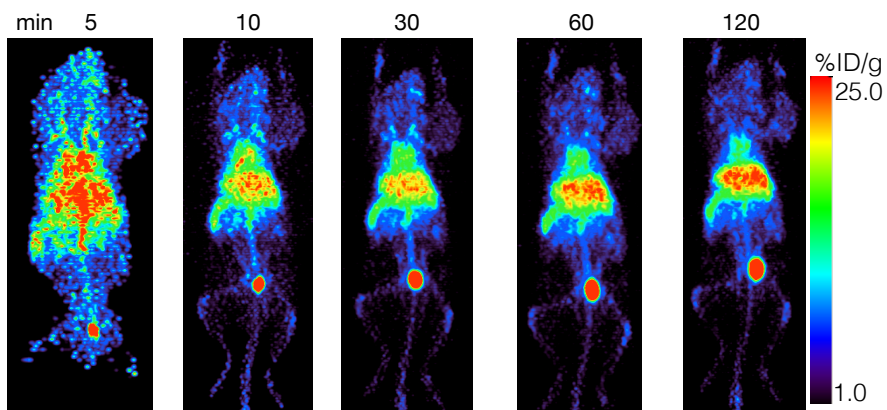

**B)  $^{89}\text{Zr}$ -anti-CD20 mlgG2a**

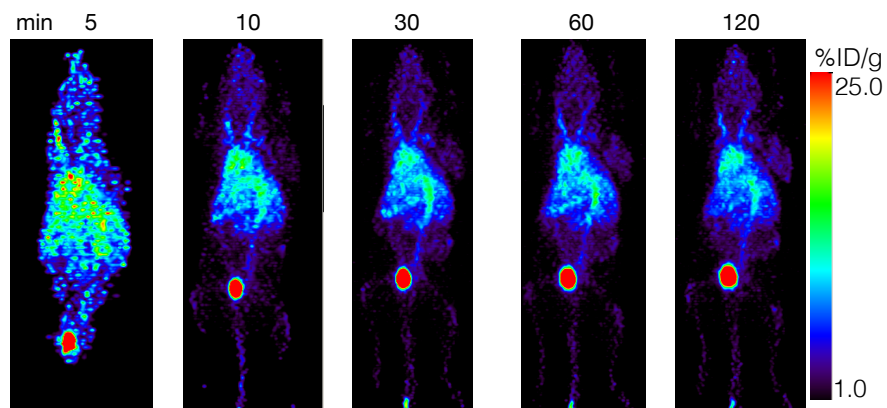

**C)  $^{89}\text{Zr}$ -anti-CD20 hlgG1-hIFN $\alpha$ 14**

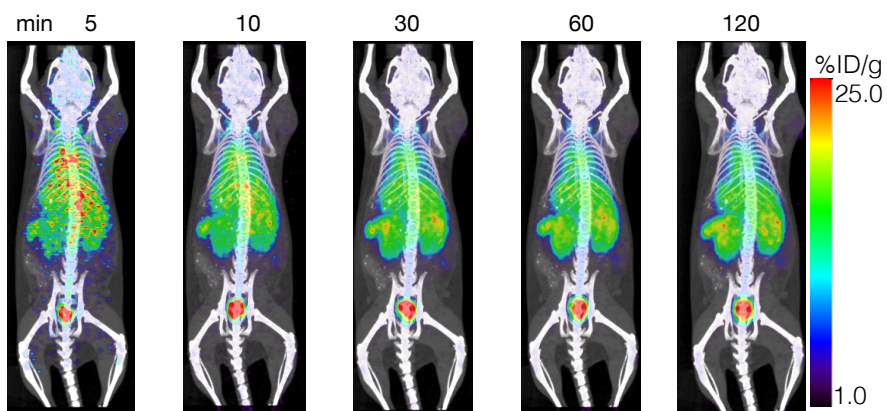

**Supplementary Figure S1. In vivo biodistribution of low dose  $^{89}\text{Zr}$ -anti-CD20 immunocytokines and  $^{89}\text{Zr}$ -anti-CD20 mAbs.**

Dynamic (0-120min) PET scans obtained post injection of 10  $\mu\text{g}$  (1.1 - 1.85 MBq) of **A)**  $^{89}\text{Zr}$ -anti-CD20 mlgG2a-mIFN $\alpha$ ; **B)**  $^{89}\text{Zr}$ -anti-CD20 mlgG2a; **C)**  $^{89}\text{Zr}$ -anti-CD20 hlgG1-hIFN $\alpha$ 14.
